1 **TITLE**

2 **Structural basis for no spectral shift of heliorhodopsin by**  
3 **counterion mutation.**

4 Tatsuki Tanaka<sup>1</sup>, Manish Singh<sup>2</sup>, Wataru Shihoya<sup>1‡</sup>, Keitaro Yamashita<sup>1</sup>, Hideki  
5 Kandori<sup>2,3‡</sup>, Osamu Nureki<sup>1‡</sup>.

6

7 **Affiliations:**

8 <sup>1</sup>Department of Biological Sciences, Graduate School of Science, The University of  
9 Tokyo, Bunkyo, Tokyo 113-0033, Japan. <sup>2</sup>Department of Life Science and Applied  
10 Chemistry, Nagoya Institute of Technology, Showa, Nagoya 466-8555, Japan.

11 <sup>3</sup>OptoBioTechnology Research Center, Nagoya Institute of Technology, Showa, Nagoya  
12 466-8555, Japan.

13

14 <sup>‡</sup>To whom correspondence should be addressed. E-mail: [wtrshh9@gmail.com](mailto:wtrshh9@gmail.com) (W.S.)  
15 [kandori@nitech.ac.jp](mailto:kandori@nitech.ac.jp) (H.K.); [nureki@bs.s.u-tokyo.ac.jp](mailto:nureki@bs.s.u-tokyo.ac.jp) (O.N.)

16

17 **Abstract**

18 Microbial rhodopsins comprise an opsin protein with seven transmembrane  
19 helices and a retinal as the chromophore. An *all-trans* retinal is covalently-bonded to a  
20 lysine residue through the retinal Schiff base (RSB) and stabilized by a negatively-  
21 charged counterion. The distance between the RSB and counterion is closely related to  
22 the light energy absorption. However, in heliorhodopsin-48C12 (HeR-48C12), while  
23 Glu107 acts as the counterion, E107D mutation exhibits an identical absorption spectrum  
24 to the wild-type, suggesting that the distance does not affect its absorption spectra. Here  
25 we present the 2.6 Å resolution crystal structure of the *Thermoplasmatales* archaeon HeR  
26 E108D mutant, which also has an identical absorption spectrum to the wild-type. The  
27 structure revealed that D108 does not form a hydrogen bond with the RSB, and its  
28 counterion interaction becomes weaker. Alternatively, serine cluster, S78, S112, and S238  
29 form a distinct interaction network around the RSB. The absorption spectra of the E to D

30 and S to A double mutants suggested that S112 influences the spectral shift by  
31 compensating for the weaker counterion interaction. Our structural and spectral studies  
32 have revealed the unique spectral shift mechanism of HeR and clarified the  
33 physicochemical properties of HeRs.

34  
35

## 36 **Main text**

### 37 **Introduction**

38 Heliorhodopsins (HeRs) are a family of microbial rhodopsins that was recently  
39 discovered by functional metagenomics<sup>1</sup>. HeRs share distant sequence identity with the  
40 type-1 (microbial) rhodopsins. The first discovered HeR was HeR-48C12, found in an  
41 actinobacterial fosmid from the freshwater Lake Kinneret and classified as a bacterial  
42 HeR. Genomic studies have led to the discovery of more than 500 rhodopsin genes in  
43 bacteria, archaea, eukaryotes, and giant viruses. HeRs have an all-*trans* retinal  
44 chromophore and undergo a photocycle involving K, M, and O intermediates upon light  
45 absorption, in parallel with retinal isomerization and proton transfer<sup>2,3</sup>. However, HeRs  
46 lack pump and channel activities, unlike the typical type-1 rhodopsins, and thus their  
47 functions have remained elusive. Moreover, HeRs exhibit long-lived photoactivated  
48 states with lifetimes ( $\tau$ ) of over a second, suggesting that HeRs are signaling  
49 photoreceptors or photoenzymes<sup>2,4</sup>.

50 Our recent crystallographic study revealed the first structure of the HeR derived  
51 from *Thermoplasmatales archaeon* SG8-52-1 (*TaHeR*)<sup>2</sup>. The transmembrane region of  
52 *TaHeR* consists of seven transmembrane helices, as in type-1 rhodopsins, but it is in an  
53 inverted orientation relative to them. *TaHeR* forms a stable dimer, and its interface  
54 comprises transmembrane helix (TM) 4, TM5, and two  $\beta$ -sheets in the ECL1. An all-  
55 *trans* retinal is covalently bound to a lysine, forming the retinal Schiff base (RSB), which  
56 is stabilized by a single counterion, E108. A linear hydrophobic pocket accommodates  
57 the retinal configuration and isomerization. Overall, *TaHeR* harbors the retinal in a similar  
58 manner to the type-1 rhodopsins, despite its many distinct features. The recently reported

59 structure of the bacterial HeR-48C12 revealed that these characteristics are common in  
60 the HeRs<sup>5,6</sup>.

61 The RSB is protonated in type-1 rhodopsins and HeRs, in which the high pKa is  
62 stabilized and maintained by a counterion<sup>2,7,8</sup>. The electrostatic interaction has been  
63 extensively studied between the positively charged retinal chromophore and the  
64 negatively charged counterion, as it is the dominant component in the regulation of light  
65 energy absorption. Most type-1 rhodopsins contain two counterions at TM3 and TM7, as  
66 in the cases of D85 and D212 in the light-driven proton-pump bacteriorhodopsin (BR),  
67 and E123 and D253 in channelrhodopsin 2 from *Chlamydomonas reinhardtii*  
68 (CrChR2)<sup>9,10</sup>. By contrast, HeRs possess a single counterion in TM3: E108 in TaHeR and  
69 E107 in HeR-48C12. A previous mutation study of HeR-48C12 revealed anion binding  
70 to the E107A and E107Q mutants, but not to the wild-type and E107D mutant<sup>8</sup>. While the  
71 results supported E107 as the counterion, a puzzling result was obtained: identical  
72 absorption spectra were observed for the wild-type and E107D mutant<sup>8,11</sup>. It is well  
73 known that stronger or weaker electrostatic interactions with the counterion cause a  
74 spectral blue- or red-shift, respectively, in both type-1 and -2 rhodopsins<sup>7</sup>. In the case of  
75 light-driven proton pumps, the D-to-E mutants cause 28 nm, 8 nm, and 23 nm blue-shifts  
76 for BR<sup>12</sup>, *Gloeobacter* rhodopsin (GR)<sup>13</sup>, and *Acetabularia* rhodopsin I (AcetR1)<sup>14</sup>,  
77 respectively. By contrast, the E-to-D mutants of CrChR2 and bovine rhodopsin (type-2  
78 rhodopsin) cause 16 nm<sup>15</sup> and 10 nm<sup>16</sup> red-shifts, respectively. In general, the D-to-E and  
79 E-to-D mutations cause spectral blue and red shifts, respectively. However, the absorption  
80 spectrum of the E107D mutant of HeR 48C12 is identical to the wild-type spectrum. This  
81 puzzling result suggests that either the counterion does not dominantly regulate energy  
82 absorption, or the other residues around the RSB compensate for the weaker counterion  
83 interaction.

84

85

86

87

## 88 **Material and Methods**

### 89 **Determination of $\lambda_{\max}$ of TaHeR WT and mutants by hydroxylamine** 90 **bleaching.**

### 91 **Gene Preparation and protein Expression.**

92 The codon-optimized full-length *T. archaeon* HeR gene (GenBank ID:  
93 KYK26602.1) containing an N-terminal histidine-tag was chemically synthesized  
94 (GenScript) and subcloned into the pET21a (+)-vector, as reported previously. For  
95 mutagenesis, a QuikChange site-directed mutagenesis kit (Stratagene) was used,  
96 according to the standard protocol. After sequence confirmation, these constructs were  
97 used to transform *E. coli* strain C43 (DE3), and protein expression was induced by 1.0  
98 mM isopropyl  $\beta$ -D-thiogalactopyranoside (IPTG) for 4 h at 37 °C, in the presence of 10  
99  $\mu$ M all-trans-retinal (Sigma-Aldrich).

### 100 **Determination of Absorption Maxima without Purification.**

101 A 4 mL culture of *E. coli* expressing the desired rhodopsin was centrifuged, and  
102 the pellet was resuspended in 3 mL of buffer, containing 50 mM Na<sub>2</sub>HPO<sub>4</sub>, 100 mM NaCl,  
103 2.0 mg lysozyme, and 10 mg DNase, pH 7.0. This mixture was gently agitated at room  
104 temperature for 1 hr. The mixture was then sonicated for complete cell lysis, combined  
105 with n-Dodecyl- $\beta$ -D-maltoside (DDM) at an effective concentration (2%) for complete  
106 solubilization of the desired protein, and mixed at 4°C overnight. Afterwards, we added  
107 a freshly prepared hydroxylamine solution to the sample (final concentration, 500 mM)  
108 and illuminated it for 30 min with a 1 kW tungsten-halogen projector lamp (Master  
109 HILUX-HR, Rigaku) through a glass filter (Y-52, AGC Techno Glass) at wavelengths  
110 >500 nm. A hot mirror was placed in front of the projector lamp to block heat radiation.  
111 Absorption changes representing the bleaching of rhodopsins by hydroxylamine were

112 measured with an ultraviolet–visible (UV–vis) spectrometer.

113

## 114 **Crystallization.**

115 The E108D mutant of TaHeR was purified as described previously<sup>2</sup>. In brief, the  
116 E108D mutant was expressed in *E. coli*, solubilized with DDM, and purified by nickel  
117 affinity chromatography. The protein was concentrated to 40 mg ml<sup>-1</sup> with a centrifugal  
118 filter device (Millipore 50 kDa MW cutoff), and frozen until crystallization.

119 The protein was reconstituted into monoolein at a weight ratio of 1:1.5  
120 (protein:lipid). The protein-laden mesophase was dispensed into 96-well glass plates in  
121 30 nl drops and overlaid with 800 nl precipitant solution, using a Gryphon robot (ARI),  
122 as described previously<sup>31</sup>. Crystals were grown at 20°C in precipitant solutions containing  
123 25% PEG 350 MME, 100 mM Na-citrate, pH 5.0, and 100 mM ammonium sulfate or  
124 lithium sulfate. The crystals were harvested directly from the LCP with micromounts  
125 (MiTeGen) or LithoLoops (Protein Wave) and frozen in liquid nitrogen, without adding  
126 any extra cryoprotectant.

127

## 128 **Data collection and structure determination.**

129 X-ray diffraction data were collected at the SPring-8 beamline BL32XU with an  
130 EIGER X 9M detector (Dectris), using a wavelength of 1.0 Å. In total, 79 small-wedge  
131 (10° per crystal) datasets using a 5×5 μm<sup>2</sup> beam were collected automatically, using the  
132 ZOO syste<sup>32</sup>. The collected images were processed using KAMO<sup>33</sup> with XDS<sup>34</sup>, and 52  
133 datasets were indexed with consistent unit cell parameters. After correlation coefficient-  
134 based clustering using the intensities, followed by merging using XSCALE<sup>34</sup> with outlier  
135 rejections implemented in KAMO, a small cluster consisting of 12 datasets was selected  
136 for the following analyses, because it gave a small inner-shell  $R_{meas}$  and high outer-shell  
137  $CC_{1/2}$ . The E108D structure was determined by molecular replacement with PHASER<sup>35</sup>,  
138 using the wild-type TaHeR structure (PDB code: 6IS6)<sup>2</sup> as the template. Subsequently,  
139 the model was rebuilt and refined with COOT<sup>36</sup> and REFMAC5<sup>37</sup>. The final model of the

140 E108D mutant of *TaHeR* contained residues 4-253 of *TaHeR*, 14 monoolein molecules,  
141 and 33 water molecules. Figures were prepared with CueMol (<http://www.cuemol.org/ja/>).

142

143

144

145

## 146 **Results**

### 147 **Structural determination of the E108D mutant of *TaHeR***

148 To investigate the effect of the E-to-D mutation in another heliorhodopsin, we  
149 measured the absorption spectra of the wild-type and E108D mutant of *TaHeR* by  
150 bleaching the retinal chromophore with hydroxylamine. The wild-type and E108D mutant  
151 exhibited identical absorption spectra, with a maximum absorption wavelength ( $\lambda_{\max}$ ) at  
152 542 nm (Fig. 1a, b). These data showed that the E to D counterion mutation does not  
153 cause a spectral shift, as in HeR-48C12, although the archaeal heliorhodopsin *TaHeR* and  
154 bacterial HeR-48C12 share relatively low sequence identity (43%). These observations  
155 suggest that the absence of a spectral shift by the counterion mutation E to D is a common  
156 feature in bacterial and archaeal HeRs.

157 To understand why the E to D mutation does not cause a spectral shift, we  
158 determined the 2.6 Å resolution crystal structure of the E108D mutant of *TaHeR*  
159 (Supplementary Fig. 1 and Supplementary Table 1). The E108D structure comprises  
160 seven transmembrane helices, a long  $\beta$ -sheet in ECL1, and a covalently bound *all-trans*  
161 retinal at K238 (Fig. 1c). While the crystallizing conditions and crystal packing of the  
162 E108D mutant differed from those of the wild-type (Supplementary Table 1 and Methods),  
163 it forms a similar dimer with the symmetric protomers (Supplementary Fig. 2a, b). The  
164 E108D structure superimposes well with the wild-type structure (0.4 Å root mean square  
165 deviation of C $\alpha$  atoms) (Fig. 1c), indicating that the E108D mutation does not affect the  
166 overall conformation.

167

## 168 **Structural effect of the E108D mutation**

169 To evaluate the effect of the E108D mutation, we compare the retinal binding  
170 pockets in the wild-type and E108D structures. The rotamers of the hydrophobic residues  
171 in the retinal binding site are almost identical (Fig. 1d). By contrast, the counterion  
172 mutation E108D alters the polar interaction network around the RSB. In the wild-type  
173 structure, the distance between the RSB and counterion carboxylate is 3.5 Å (Fig. 2a).  
174 Thus, they form a hydrogen bond in addition to the electrostatic interactions, as also  
175 supported by a previous resonance Raman analysis<sup>3</sup>. In the E108D structure, this distance  
176 becomes longer (4.9 Å), and thus the counterion can no longer form a hydrogen bond  
177 with the RSB (Fig. 2b and Supplementary Fig. 3). We could not observe a density  
178 corresponding to a water between the counterion and RSB in the 2.6 Å resolution structure  
179 (Supplementary Fig. 3), suggesting that they do not even form a water-mediated  
180 hydrogen-bonding interaction. As the interaction between the RSB and counterion  
181 becomes weaker, we expected the E108D mutant exhibits a blue-shifted absorption.

182 Notably, the E108D mutation rearranges the polar interaction network around the  
183 RSB-counterion complex. In the wild-type structure, the hydroxyl groups of S112 in TM3  
184 and S234 in TM7 sandwich the RSB and form polar interactions (Fig. 2a). The counterion  
185 E108 only forms a hydrogen bond with the RSB. In the E108D structure, the distance  
186 between the hydroxyl group of S112 and the counterion is closer (3.8 Å to 3.0 Å) to allow  
187 a hydrogen-bonding interaction (Fig. 2b). Moreover, the S78 side chain in TM2 flips and  
188 also forms a hydrogen bond with the counterion (Fig. 2c). The RSB moves in the opposite  
189 direction from the counterion by 0.7 Å, and the S234 side chain also shifts slightly.  
190 Although the interaction between the counterion and RSB certainly becomes weaker, the  
191 interactions involving S78, S112, and S234 are rearranged (Supplementary Table 3) to  
192 establish additional hydrogen-bonding interactions in the E108D structure (S78-D108  
193 and S112-D108). These serine residues are conserved in *TaHeR* and *HeR-48C12*. The  
194 aforementioned hydrogen-bonding interactions would compensate for the weaker  
195 counterion interaction by the E108D mutation and retain the absorption spectrum.

## 196 **Mutational analysis around the RSB.**

197 To examine the effects of these serine residues, we measured the absorption  
198 spectra of the single mutants (S78A, S112A, and S234A) and the double mutants  
199 (S78A/E108D, S112A/E108D, and S234A/E108D). If these serine residues compensate  
200 for the weaker counterion interaction, then the S to A/E108D double mutant should show  
201 red-shifted absorption as compared with that of the single S to A mutant. First, we describe  
202 the results of the S78 and S234 mutations (Fig. 3a-d). The single mutants S78A and  
203 S234A showed a 2 nm red-shifted absorption at 544 nm, as compared with that of the  
204 wild-type (Fig. 3a, c). Unexpectedly, the S78A/E108D and S234A/E108D double mutants  
205 showed maximum absorption wavelengths at 532 nm and 540 nm, which are blue-shifted  
206 by 14 and 4 nm, respectively (Fig. 3b, d). These results suggest that S78 and S234 are not  
207 associated with the lack of a spectral shift by the E108D mutation. We cannot precisely  
208 explain these blue-shifted absorptions, and especially that of the S78A/E108D double  
209 mutant. The S78A/E108D double mutation shortens their side chains and would create  
210 more space around the counterion. This extra space may allow water molecules to enter  
211 and stabilize the RSB by additional water-mediated hydrogen-bonding interactions,  
212 resulting in the blue-shifted absorption spectra.

213 Next, we describe the results obtained with the S112 mutant. The S112A mutant  
214 showed a 12 nm red-shifted absorption at 554 nm, as compared with that of the wild-type  
215 (Fig. 3e), indicating that it plays a critical role in stabilizing the RSB. Moreover, the  
216 maximum absorption wavelength ( $\lambda_{\max}$ ) of the S112A/E108D double mutant was 559  
217 nm (Fig. 3f), which is 5 nm red-shifted as compared with that of the S112A mutant. This  
218 result indicates that the E108D mutation causes the spectral red shift in the *TaHeR* S112A  
219 mutant. Therefore, S112 compensates for the weaker counterion interaction by the E108D  
220 mutation and maintains the absorption spectra. The polar interactions of S112 with the  
221 RSB-counterion complex would be essential for this effect (Fig. 2b).

222 S112 is located just one helical turn above the counterion (E108) and conserved  
223 among most HeRs (97%). The distances between the hydroxyl group of the serine and  
224 RSB are 3.0 Å and 3.2 Å in *TaHeR* and HeR-48C12, respectively<sup>2,5</sup> (Fig. 4a, b). By



225 contrast, the equivalent residue is conserved as a threonine in most type-1 rhodopsins.  
226 The distance between the hydroxyl group of the threonine and RSB is about 3.7 Å in the  
227 representative type-1 rhodopsins (BR, CrChR2, and rhodopsin phosphodiesterase)<sup>9,10,17,18</sup>  
228 (Fig. 4c-e), which is longer than those in the HeRs. Marti *et al.* reported largely blue-  
229 shifted absorption spectra for the BR T89A mutant, when expressed in *E. coli*<sup>19</sup>. However,  
230 when expressed in *H. salinarum*, the native cells of BR, the T89A mutant showed similar  
231 absorption spectra to those of the wild type<sup>20</sup>. Moreover, Ehrenberg *et al.* reported  
232 CrChR2 T127A mutation shifted the visible absorption spectrum only slightly to the blue  
233 as compared to the wild-type<sup>21</sup>. These studies indicate that the threonine is not involved  
234 in stabilizing the RSB, in contrast to S112 in *TaHeR*. This difference is one of the critical  
235 factors determining whether the counterion mutation E to D causes a spectral shift.

236

## 237 **Discussion**

238 Our study revealed that the E to D mutation of the counterion does not alter the  
239 absorption spectrum of *TaHeR*, suggesting that this feature is common among HeRs. The  
240 crystal structure of the E108D mutant revealed that the mutation only alters the  
241 environment around the RSB. The E108D mutation certainly increases the distance  
242 between the counterion and RSB, and affects the polar interaction network between the  
243 RSB, the nearby serine residues, and the counterion. Notably, S112 and the counterion  
244 form an additional hydrogen bond in the E108D structure. The mutant analysis showed  
245 that the E108D mutation causes a 5 nm red-shift in the S112A mutant, suggesting that  
246 S112 stabilizes the RSB by the hydrogen-bonding interaction with the counterion and  
247 thus retains the absorption spectra. Our study suggests that S112 compensates for the  
248 weaker counterion interaction by the E108D mutation. This unique feature of *TaHeR*  
249 might be associated with its physiological function.

250 The mechanism of color tuning in type-1 and -2 rhodopsins has fascinated  
251 researchers for a long time, as it relates to our color discrimination<sup>7,22-27</sup>. While light  
252 energy absorption is determined by complex factors to control the energy gap between  
253 the ground and excited states of the retinal chromophore, the electrostatic interaction of

254 retinal with the counterion(s) is the most prominent factor in color tuning. Despite the  
255 significant improvements of theoretical calculations<sup>28–30</sup>, full reproductions of the  
256 absorption spectra from the structures of rhodopsins by computation remain difficult. The  
257 present study has provided a theoretical challenge, where the weakened interaction of the  
258 counterion in E108D is compensated by the reorganized environment around counterion,  
259 leading to identical absorption maxima between the mutant and wild-type *TaHeRs*.

260

261

## 262 **Acknowledgements**

263 The diffraction experiments were performed at SPring-8 BL32XU (proposal  
264 (2019B2577)). We thank the members of the Nureki lab and the beamline staff at BL32XU  
265 of SPring-8 (Sayo, Japan) for technical assistance during data collection. This research  
266 was partially supported by the Platform Project for Supporting Drug Discovery and Life  
267 Science Research (Basis for Supporting Innovative Drug Discovery and Life Science  
268 Research (BINDS)) from AMED under grant number JP19am0101070 (support number  
269 1627). This work was also supported by JSPS KAKENHI grants 16H06294 (O.N.),  
270 17J30010, 30809421, 20K15728, 20H05437 (W.S.), 25104009, 18H03986, 19H04959  
271 (H.K.), and by JST CREST (JPMJCR1753 to H.K.).

272

## 273 **Contributions**

274 T.T. purified, crystallized, and solved the structure of the E108D mutant of *TaHeR*.  
275 M.S. performed spectroscopic analyses. K.Y. assisted with the structural determination.  
276 W.S, H.K. and O.N. supervised the research.

277

## 278 **Data Availability**

279 Coordinates and structure factors have been deposited in the Protein Data Bank,  
280 under the accession number XXXX. The X-ray diffraction images are also available at  
281 the Zenodo data repository (<https://doi.org/10.5281/zenodo.3871080>).

282

## 283 **Competing interests**

284 The authors declare no competing financial interests.

285

## 286 **Figures**

### 287 **Fig. 1. Overall structure of the *TaHeR* E108D mutant.**

288 **a, b**, Light-induced difference absorption spectra of the WT (black curves) and the E108D  
289 mutant (red curves) of *TaHeR* in the presence of 500 mM hydroxylamine. Positive and  
290 negative signals show the spectra before and after illumination, corresponding to those of  
291 the rhodopsin and retinal oxime, respectively. **c**, Superimposed structures of the wild-type  
292 (Protein Data Bank (PDB) code: 6IS6)<sup>2</sup> and E108D mutant of *TaHeR*, colored dark  
293 turquoise and magenta, respectively. **d**, Comparison of the retinal binding sites in the  
294 wild-type and E108D mutant of *TaHeR*.

295

### 296 **Fig. 2. Interactions around the retinal Schiff base.**

297 **a, b**, Comparison of the interactions around the RSB and counterion in the wild-type (**a**)  
298 and E108D mutant (**b**), viewed from the extracellular side. Hydrogen-bonding  
299 interactions are indicated by black dashed lines. The water is shown as a red sphere. **c**,  
300 Overlay of **a** and **b**.

301

### 302 **Fig. 3. Spectroscopic analysis of *TaHeR* mutants.**

303 **a-f**, Light-induced difference absorption spectra of the WT (black curves) and mutants of

304 the Schiff base region (red curves) of *TaHeR* in the presence of 500 mM hydroxylamine.  
305 Positive and negative signals represent the spectra before and after illumination,  
306 corresponding to those of the rhodopsin and retinal oxime, respectively.

307

#### 308 **Fig. 4. Comparison of the residues around the RSB.**

309 **a-e**, Interactions around the RSB in *TaHeR* (PDB code: 6IS6)<sup>2</sup>, HeR-48C12 (PDB code:  
310 6SU3)<sup>5</sup>, BR (PDB code: 1C3W)<sup>9</sup>, CrChR2 (PDB code: 6EID)<sup>10</sup>, and Rh-PDE (PDB code:  
311 XXX)<sup>17</sup>. Hydrogen-bonding interactions are indicated by black dashed lines. The water  
312 is shown as a red sphere.

313

314

#### 315 **Supplementary Figures**

##### 316 **Supplementary Fig. 1. Crystallization.**

317 **a, b**, Crystals of the *TaHeR* E108D mutant (**a**) and its diffraction image (**b**).

318

##### 319 **Supplementary Fig. 2. Dimer interface.**

320 **a, b**, Dimer interfaces in the *TaHeR* WT (**a**) and E108D (**b**) structures. **c, d**, Panels  
321 showing the interactions between the transmembrane region and the ECL1 in the  
322 symmetric protomers of *TaHeR* WT (**c**) and the E108D mutant (**d**). Hydrogen bonding  
323 interactions are indicated by black dashed lines.

324

##### 325 **Supplementary Fig. 3. Electron density around the counterion.**

326 The polder omit map ( $mF_o - DF_c$ )<sup>38</sup> contoured at  $3.2\sigma$ , calculated by omitting the retinal  
327 and side chains of S78, D108, S112, K234, and S238.

328

329 **Supplementary Table 1. Data collection and refinement statistics.**

3301. \*Values in parentheses are for the highest-resolution shell.

331

332 **References**

- 333 1. Pushkarev, A. *et al.* A distinct abundant group of microbial rhodopsins discovered  
334 using functional metagenomics. *Nature* **558**, 595–599 (2018).
- 335 2. Shihoya, W. *et al.* Crystal structure of heliorhodopsin. *Nature* **574**, 132–136 (2019).
- 336 3. Otomo, A. *et al.* Resonance Raman Investigation of the Chromophore Structure of  
337 Heliorhodopsins. *J. Phys. Chem. Lett.* **9**, 6431–6436 (2018).
- 338 4. Shibukawa, A. *et al.* Photochemical Characterization of a New Heliorhodopsin from  
339 the Gram-Negative Eubacterium *Bellilinea caldifistulae* (BcHeR) and Comparison  
340 with Heliorhodopsin-48C12. *Biochemistry* **58**, 2934–2943 (2019).
- 341 5. Kovalev, K. *et al.* High-resolution structural insights into the heliorhodopsin family.  
342 *Proc. Natl. Acad. Sci.* **117**, 4131–4141 (2020).
- 343 6. Lu, Y. *et al.* Crystal structure of heliorhodopsin 48C12. *Cell Res.* **30**, 88–90 (2020).
- 344 7. Ernst, O. P. *et al.* Microbial and Animal Rhodopsins: Structures, Functions, and  
345 Molecular Mechanisms. *Chem. Rev.* **114**, 126–163 (2014).

- 346 8. Singh, M., Katayama, K., Bèjà, O. & Kandori, H. Anion binding to mutants of the  
347 Schiff base counterion in heliorhodopsin 48C12. *Phys. Chem. Chem. Phys.* **21**,  
348 23663–23671 (2019).
- 349 9. Luecke, H., Schobert, B., Richter, H.-T., Cartailler, J.-P. & Lanyi, J. K. Structure of  
350 bacteriorhodopsin at 1.55 Å resolution 11Edited by D. C. Rees. *J. Mol. Biol.* **291**,  
351 899–911 (1999).
- 352 10. Volkov, O. *et al.* Structural insights into ion conduction by channelrhodopsin 2.  
353 *Science* **358**, (2017).
- 354 11. Singh, M., Inoue, K., Pushkarev, A., Bèjà, O. & Kandori, H. Mutation Study of  
355 Heliorhodopsin 48C12. *Biochemistry* **57**, 5041–5049 (2018).
- 356 12. Lanyi, J. K. Proton transfer and energy coupling in the bacteriorhodopsin photocycle.  
357 *J. Bioenerg. Biomembr.* **24**, 169–179 (1992).
- 358 13. Engqvist, M. K. M. *et al.* Directed evolution of *Gloeobacter violaceus* rhodopsin  
359 spectral properties. *J. Mol. Biol.* **427**, 205–220 (2015).
- 360 14. Lee, K. A. *et al.* Mistic-fused expression of algal rhodopsins in *Escherichia coli* and  
361 its photochemical properties. *Biochim. Biophys. Acta BBA - Gen. Subj.* **1850**, 1694–  
362 1703 (2015).
- 363 15. Scholz, F., Bamberg, E., Bamann, C. & Wachtveitl, J. Tuning the Primary Reaction

- 364 of Channelrhodopsin-2 by Imidazole, pH, and Site-Specific Mutations. *Biophys. J.*  
365 **102**, 2649–2657 (2012).
- 366 16. Nathans, J. Determinants of visual pigment absorbance: role of charged amino acids  
367 in the putative transmembrane segments. *Biochemistry* **29**, 937–942 (1990).
- 368 17. Ikuta, T. *et al.* Structural insights into the mechanism of rhodopsin phosphodiesterase.  
369 *bioRxiv* 2020.04.14.040642 (2020) doi:10.1101/2020.04.14.040642.
- 370 18. Watari, M. *et al.* Spectroscopic study of the transmembrane domain of a rhodopsin–  
371 phosphodiesterase fusion protein from a unicellular eukaryote. *J. Biol. Chem.* **294**,  
372 3432–3443 (2019).
- 373 19. Marti, T. *et al.* Bacteriorhodopsin mutants containing single substitutions of serine or  
374 threonine residues are all active in proton translocation. *J. Biol. Chem.* **266**, 6919–  
375 6927 (1991).
- 376 20. Shibata, M. & Kandori, H. FTIR Studies of Internal Water Molecules in the Schiff  
377 Base Region of Bacteriorhodopsin. *Biochemistry* **44**, 7406–7413 (2005).
- 378 21. Ehrenberg, D. *et al.* Atomistic Insight into the Role of Threonine 127 in the Functional  
379 Mechanism of Channelrhodopsin-2. *Appl. Sci.* **9**, 4905 (2019).
- 380 22. Wald, G. The Molecular Basis of Visual Excitation. *Nature* **219**, 800–807 (1968).
- 381 23. Blatz, P. E., Mohler, J. H. & Navangul, H. V. Anion-induced wavelength regulation

- 382 of absorption maxima of Schiff bases of retinal. *Biochemistry* **11**, 848–855 (1972).
- 383 24. Nathans, J., Piantanida, T. P., Eddy, R. L., Shows, T. B. & Hogness, D. S. Molecular  
384 genetics of inherited variation in human color vision. *Science* **232**, 203–210 (1986).
- 385 25. Krebs, M. P., Spudich, E. N., Khorana, H. G. & Spudich, J. L. Synthesis of a gene for  
386 sensory rhodopsin I and its functional expression in *Halobacterium halobium*. *Proc.*  
387 *Natl. Acad. Sci.* **90**, 3486–3490 (1993).
- 388 26. Man, D. *et al.* Diversification and spectral tuning in marine proteorhodopsins. *EMBO*  
389 *J.* **22**, 1725–1731 (2003).
- 390 27. Katayama, K., Nonaka, Y., Tsutsui, K., Imai, H. & Kandori, H. Spectral Tuning  
391 Mechanism of Primate Blue-sensitive Visual Pigment Elucidated by FTIR  
392 Spectroscopy. *Sci. Rep.* **7**, 4904 (2017).
- 393 28. Wanko, M., Hoffmann, M., Frauenheim, T. & Elstner, M. Computational  
394 photochemistry of retinal proteins. *J. Comput. Aided Mol. Des.* **20**, 511–518 (2006).
- 395 29. Fujimoto, T. & Awaga, K. Electric-double-layer field-effect transistors with ionic  
396 liquids. *Phys. Chem. Chem. Phys.* **15**, 8983–9006 (2013).
- 397 30. Sapunar, M., Piteša, T., Davidović, D. & Došlić, N. Highly Efficient Algorithms for  
398 CIS Type Excited State Wave Function Overlaps. *J. Chem. Theory Comput.* **15**, 3461–  
399 3469 (2019).



- 400 31. Nagiri, C. *et al.* Crystal structure of human endothelin ETB receptor in complex with  
401 peptide inverse agonist IRL2500. *Commun. Biol.* **2**, 236 (2019).
- 402 32. Hirata, K. *et al.* ZOO: an automatic data-collection system for high-throughput  
403 structure analysis in protein microcrystallography. *Acta Crystallogr. Sect. Struct. Biol.*  
404 **75**, 138–150 (2019).
- 405 33. Yamashita, K., Hirata, K. & Yamamoto, M. KAMO: towards automated data  
406 processing for microcrystals. *Acta Crystallogr. Sect. Struct. Biol.* **74**, 441–449 (2018).
- 407 34. Kabsch, W. XDS. *Acta Crystallogr. D Biol. Crystallogr.* **66**, 125–132 (2010).
- 408 35. McCoy, A. J. *et al.* Phaser crystallographic software. *J. Appl. Crystallogr.* **40**, 658–  
409 674 (2007).
- 410 36. Emsley, P., Lohkamp, B., Scott, W. G. & Cowtan, K. Features and development of  
411 Coot. *Acta Crystallogr. D Biol. Crystallogr.* **66**, 486–501 (2010).
- 412 37. Murshudov, G. N. *et al.* REFMAC 5 for the refinement of macromolecular crystal  
413 structures. *Acta Crystallogr. D Biol. Crystallogr.* **67**, 355–367 (2011).
- 414 38. Liebschner, D. *et al.* Polder maps: improving OMIT maps by excluding bulk solvent.  
415 *Acta Crystallogr. Sect. Struct. Biol.* **73**, 148–157 (2017).  
416

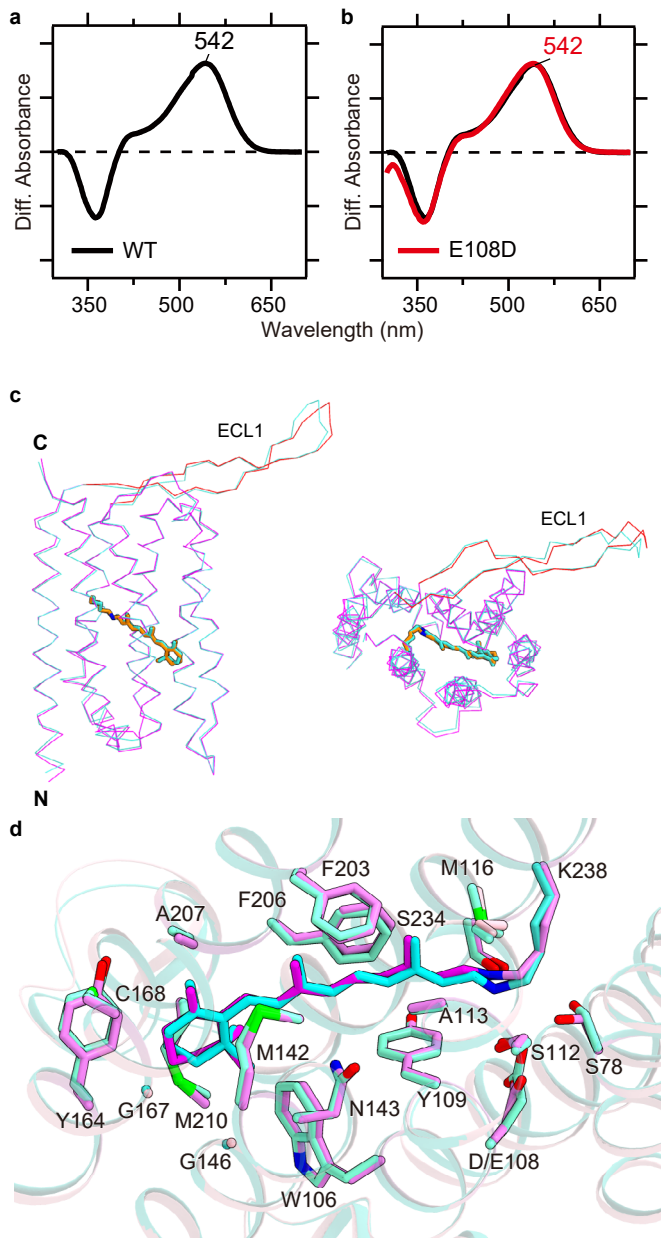

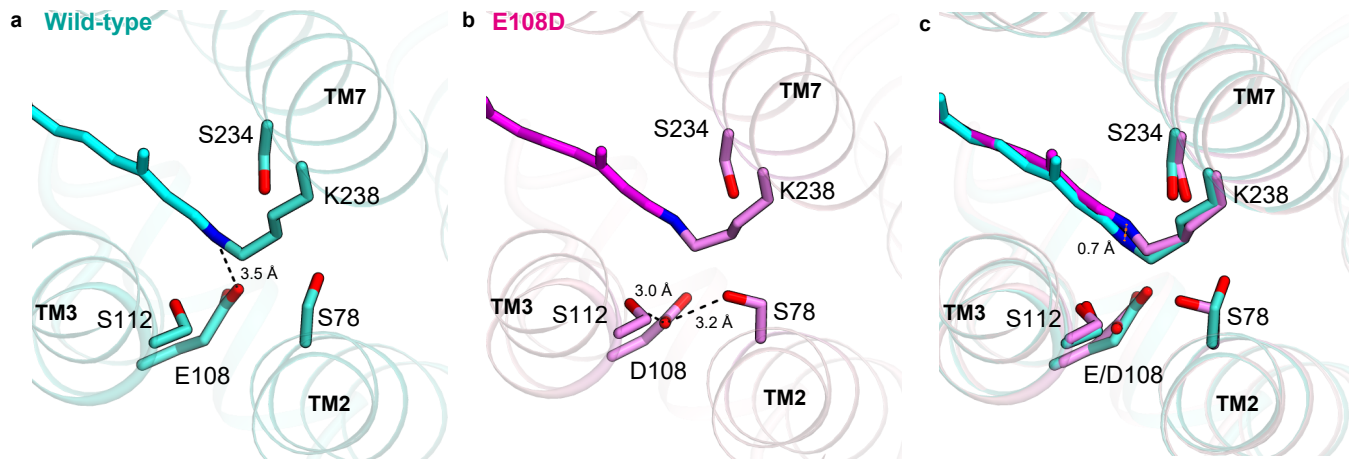

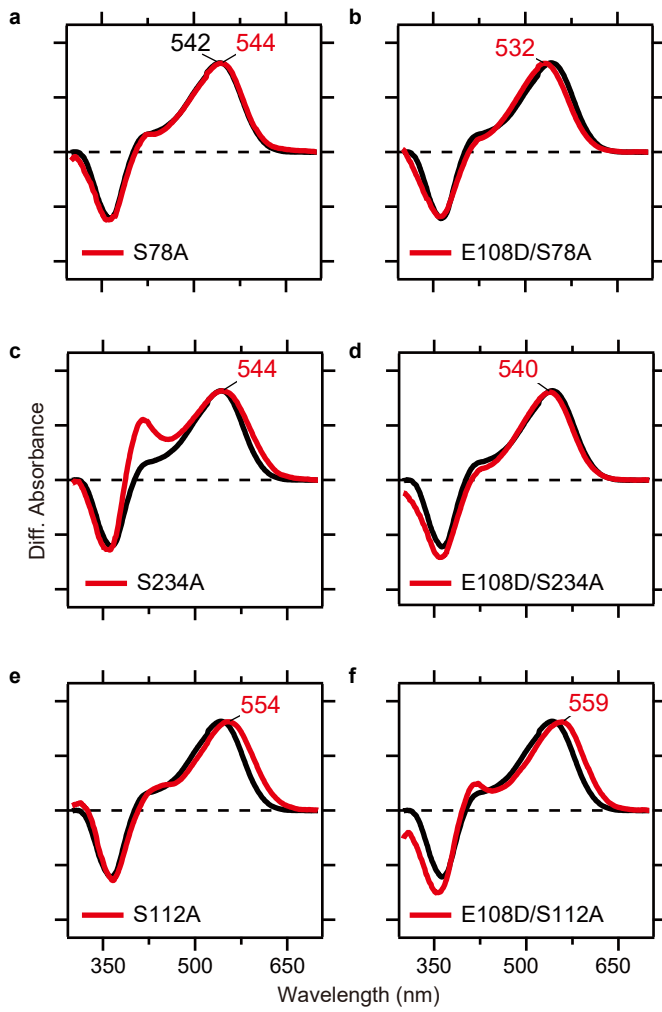

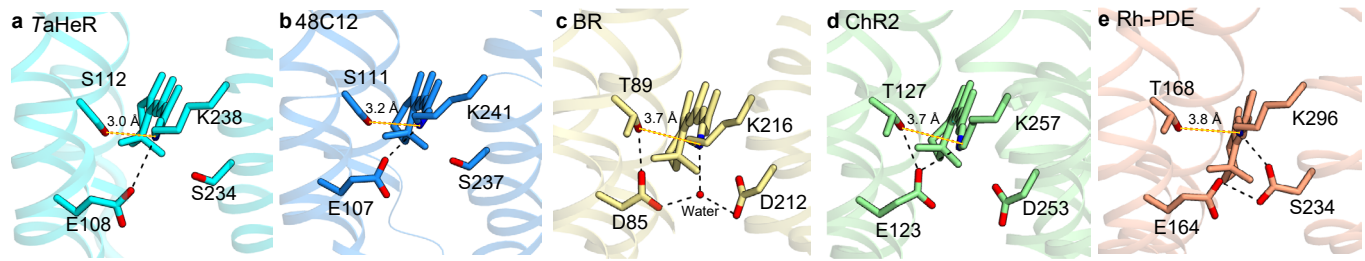

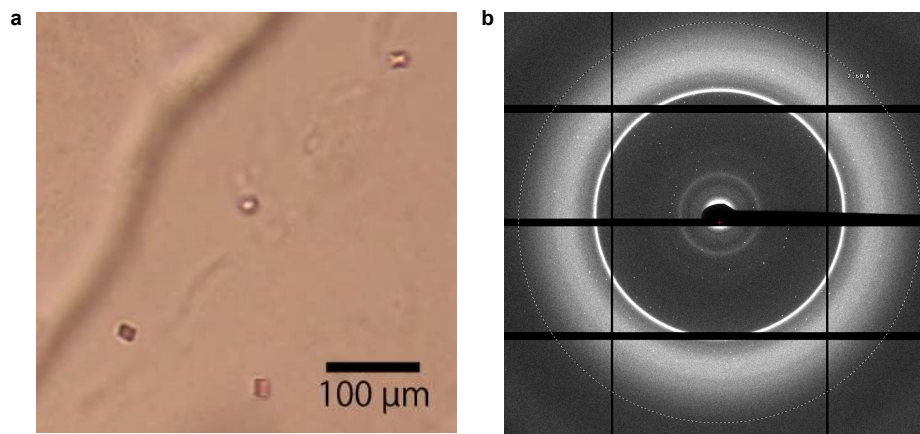

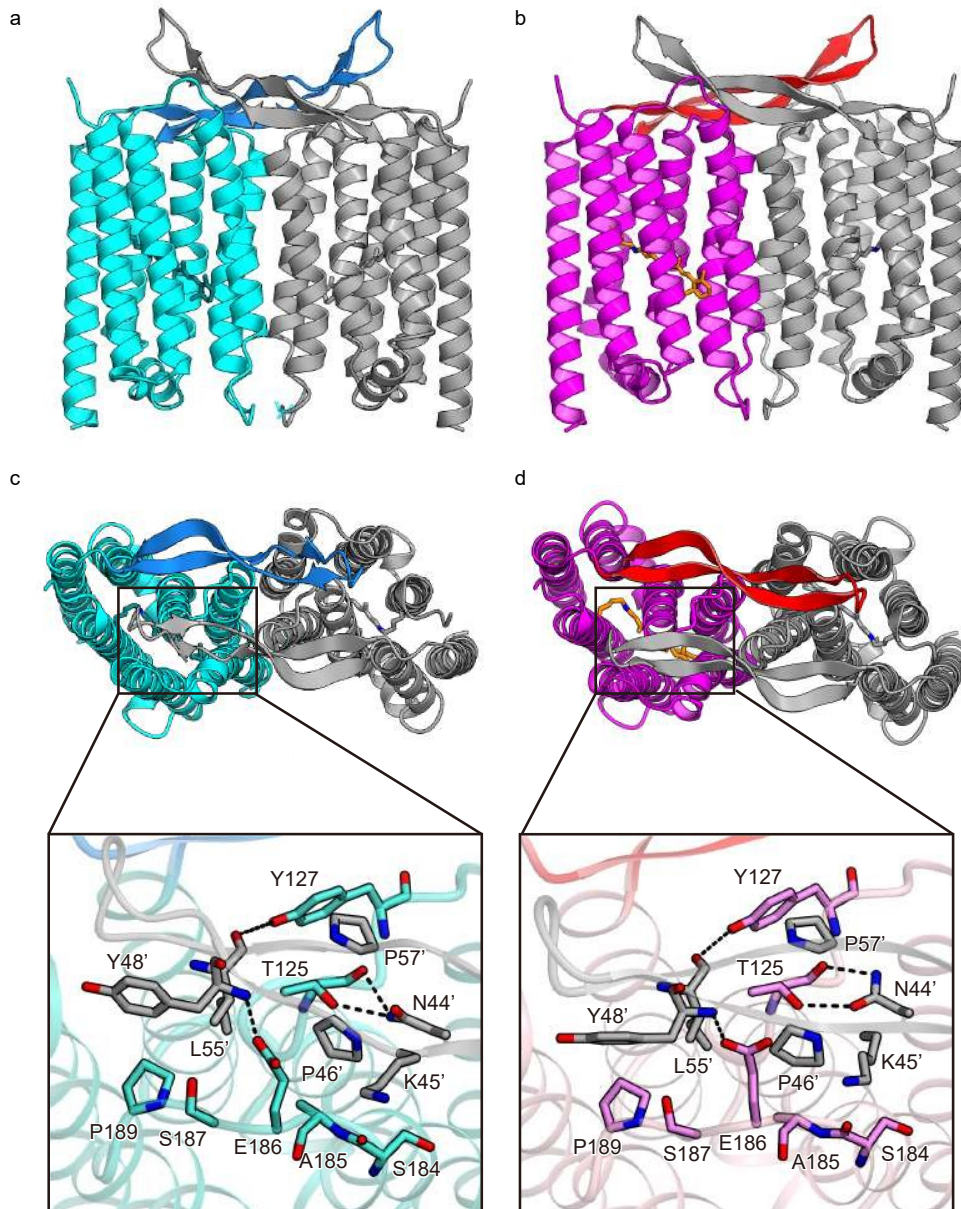

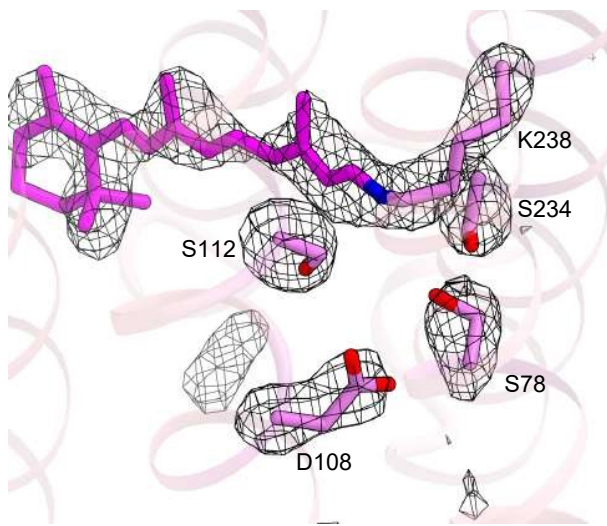



|                                      | <b>Native</b>                       |
|--------------------------------------|-------------------------------------|
| <b>Data collection</b>               |                                     |
| Space group                          | <i>P4<sub>2</sub>2<sub>1</sub>2</i> |
| Cell dimensions                      |                                     |
| a=b, c (Å)                           | 72.9, 115.0                         |
| Resolution (Å) <sup>a</sup>          | 30-2.60 (2.75-2.60)                 |
| R <sub>meas</sub> <sup>a</sup>       | 0.380 (1.806)                       |
| <I/σ(I)> <sup>a</sup>                | 5.36 (1.04)                         |
| CC <sub>1/2</sub> <sup>a</sup>       | 0.982 (0.484)                       |
| Completeness (%) <sup>a</sup>        | 99.1 (98.6)                         |
| Redundancy <sup>a</sup>              | 7.71 (7.60)                         |
| <b>Refinement</b>                    |                                     |
| Resolution (Å)                       | 30-2.6                              |
| No. unique reflections               | 9975                                |
| R <sub>work</sub> /R <sub>free</sub> | 0.2215/0.2834                       |
| No. atoms                            |                                     |
| Protein                              | 2007                                |
| Ligand                               | 250                                 |
| Water                                | 15                                  |
| Averaged B-factors (Å <sup>2</sup> ) |                                     |
| Protein                              | 38.9                                |
| Ligand                               | 62.2                                |
| Water                                | 33.8                                |
| R.m.s. deviations from ideal         |                                     |
| Bond lengths (Å)                     | 0.0049                              |
| Bond angles (°)                      | 1.3595                              |
| Ramachandran plot                    |                                     |
| Favored (%)                          | 97.18                               |
| Allowed (%)                          | 2.82                                |
| Outlier (%)                          | 0                                   |

<sup>a</sup>Values in parentheses are for the highest-resolution shell.

| <b>Distance from RSB (Å)</b> | <b>WT</b> | <b>E108D</b> |
|------------------------------|-----------|--------------|
| E/D108                       | 3.5       | 4.9          |
| S78                          | 4.6       | 3.8          |
| S112                         | 3.0       | 3.7          |
| S234                         | 3.2       | 3.6          |
